# Supplementary material for: Global incidence of malignant brain and other central nervous system tumors by histology, 2003–2007
Source: Oxford University Press journal article supplement (doi:10.1093/neuonc/nox091), 2017-05-03
Supplement: nox091_suppl_global_incidence_supplementary_tables.doc [file nox091_suppl_global_incidence_supplementary_tables.doc]

**Supplementary Table 1. International Classification of Diseases for Oncology, Third Edition (ICD-O-3)site and histology codes**

| **Site or Histology group** | **ICD-O-3 site code** | **ICD-O-3 histology codes** |
| --- | --- | --- |
| Meninges | C70 |  |
| Brain | C71 |  |
| Other Parts of the CNS | C72 |  |
| Tumors of the meninges | C70.1-C70.9 |  |
| Astrocytic tumors | C71.1-C72.9 | 9384, 9400-9421, 9424, 9440-9442 |
| Oligodendroglial tumors and mixed gliomas | C71.1-C72.9 | 9382, 9450-9451 |
| Ependymal tumors | C71.1-C72.9 | 9383, 9391-9394 |
| Medulloblastoma | C71.1-C72.9 | 9470-9472, 9474 |
| Other embryonal tumors | C71.1-C72.9 | 9473, 9490, 9500-9504, 9508 |

Abbreviations: ICD-O-3: International Classification of Diseases for Oncology, Third Edition

**Supplementary Table 2**. Registries included in each regional category, years of available data, and quality metrics for malignant brain and CNS tumors (CI5-X)

| **Region** | **Registry** | **Years** | **Males** | | | | **Females** | | | |
| --- | --- | --- | --- | --- | --- | --- | --- | --- | --- | --- |
| **Total Cases** | **MV (%)** | **DCO (%)** | **MIR** | **Total Cases** | **MV (%)** | **DCO (%)** | **MIR** |
| **Australia and New Zealand** | Australia, New South Wales | 2003-2007 | 1,430 | 87.4% | 1.0% | 0.71 | 1,065 | 82.9% | 1.1% | 0.68 |
| Australia, Northern Territory | 2003-2007 | 29 | 62.1% | 0.0% | 0.72 | 15 | 80.0% | 0.0% | 0.40 |
| Australia, Queensland | 2003-2007 | 823 | 84.2% | 0.5% | 0.88 | 537 | 77.7% | 0.9% | 0.89 |
| Australia, Tasmania | 2003-2007 | 113 | 89.4% | 0.9% | 0.85 | 82 | 86.6% | 0% | 0.62 |
| Australia, Victoria | 2003-2007 | 1,062 | 89.5% | 1.0% | 0.78 | 850 | 81.8% | 3.6% | 0.75 |
| Australian Capital Territory | 2003-2007 | 65 | 92.3% | 0.0% | 0.78 | 60 | 80.0% | 1.7% | 0.58 |
| New Zealand | 2003-2007 | 773 | 78.3% | 2.7% | 0.89 | 587 | 74.1% | 4.6% | 0.79 |
| South Australia | 2003-2007 | 373 | 78.8% | 0.0% | 0.80 | 252 | 71.8% | 0% | 0.72 |
| Western Australia | 2003-2007 | 417 | 82.3% | 0.5% | 0.71 | 298 | 80.2% | 0.7% | 0.79 |
| **Canada** | Canada | 2003-2007 | 6,827 | 79.4% | 1.1% | 0.67 | 5,278 | 72.4% | 2.0% | 0.65 |
| **East Asia** | China, Beijing City | 2003-2007 | 766 | 71.1% | 0.7% | 0.77 | 612 | 61.6% | 0.7% | 0.82 |
| China, Cixian County | 2003-2007 | 57 | 78.9% | 3.5% | 1.28 | 37 | 83.8% | 2.7% | 1.54 |
| China, Haining County | 2003-2007 | 79 | 53.2% | 1.3% | 0.95 | 76 | 50.0% | 6.6% | 0.71 |
| China, Harbin City, Nangang District | 2003-2007 | 191 | 55.5% | 0.5% | 0.50 | 196 | 50.0% | 2.0% | 0.48 |
| China, Hong Kong | 2003-2007 | 533 | 91.0% | 0.2% | 0.54 | 392 | 84.7% | 2.8% | 0.56 |
| China, Jiashan County | 2003-2007 | 83 | 63.9% | 0.0% | 0.71 | 78 | 74.4% | 1.3% | 0.62 |
| China, Jiaxing City | 2003-2007 | 69 | 42.0% | 1.4% | 0.52 | 78 | 42.3% | 3.8% | 0.27 |
| China, Macao | 2003-2007 | 24 | 70.8% | 0.0% | 0.79 | 17 | 47.1% | 5.9% | 0.88 |
| China, Qidong County | 2003-2007 | 191 | 25.7% | 5.2% | 1.26 | 187 | 31.0% | 2.7% | 0.83 |
| China, Shanghai City | 2003-2007 | 1,287 | 50.6% | 0.5% | 0.62 | 1,690 | 48.6% | 0.2% | 0.42 |
| China, Wuhan City | 2003-2007 | 780 | 64.4% | -- | 0.57 | 839 | 66.6% | -- | 0.47 |
| China, Yangcheng County | 2003-2007 | 28 | 64.3% | -- | 0.96 | 28 | 75.0% | -- | 0.82 |
| China, Yanting County | 2003-2007 | 81 | 46.9% | 4.9% | 0.86 | 35 | 45.7% | 8.6% | 1.57 |
| China, Zhongshan City | 2003-2007 | 70 | 97.1% | -- | 1.71 | 53 | 96.2% | -- | 1.43 |
| Japan, Aichi Prefecture | 2003-2007 | 142 | 68.3% | 20.4% | 0.47 | 113 | 61.1% | 26.5% | 0.35 |
| Japan, Fukui Prefecture | 2003-2007 | 97 | 73.2% | 4.1% | 0.36 | 93 | 46.2% | 10.8% | 0.24 |
| Japan, Hiroshima | 2003-2007 | 122 | 91.8% | 2.5% | 0.27 | 92 | 81.5% | 4.3% | 0.26 |
| Japan, Miyagi Prefecture | 2003-2007 | 190 | 81.1% | 2.1% | 0.45 | 130 | 77.7% | 3.8% | 0.48 |
| Japan, Nagasaki Prefecture | 2003-2007 | 128 | 92.2% | 0.0% | 0.45 | 99 | 81.8% | 5.1% | 0.43 |
| Japan, Niigata Prefecture | 2003-2007 | 192 | 68.8% | 10.9% | 0.59 | 166 | 71.1% | 6% | 0.45 |
| Japan, Osaka Prefecture | 2003-2007 | 695 | 67.1% | 11.1% | 0.44 | 641 | 59.9% | 13.9% | 0.37 |
| Japan, Saga Prefecture | 2003-2007 | 76 | 75% | 2.6% | 0.42 | 53 | 84.9% | 1.9% | 0.55 |
| Republic of Korea | 2003-2007 | 4,084 | 67.1% | 6.4% | 0.74 | 3,673 | 61.6% | 8.1% | 0.73 |
| Singapore | 2003-2007 | 230 | 83.5% | 4.8% | 0.70 | 191 | 84.3% | 3.1% | 0.53 |
| **Eastern Europe and Central Asia** | Belarus | 2003-2007 | 1,169 | 86.1% | -- | 0.99 | 1,157 | 83.5% | -- | 0.85 |
| Bulgaria | 2003-2007 | 1,840 | 63% | 23.4% | 0.92 | 1,551 | 61.7% | 23.5% | 0.88 |
| Czech Republic | 2003-2007 | 2,047 | 77.1% | 1.6% | 0.94 | 1,837 | 72.5% | 2.4% | 0.99 |
| Poland, Cracow | 2003-2006 | 145 | 64.1% | 5.5% | 0.81 | 184 | 64.7% | 7.1% | 0.70 |
| Poland, Kielce | 2003-2007 | 313 | 57.5% | 3.8% | 0.73 | 316 | 55.1% | 1.9% | 0.65 |
| Poland, Lower Silesia | 2003-2007 | 603 | 58.9% | 0.8% | 0.94 | 629 | 51.4% | 0.5% | 0.89 |
| Poland, Podkarpackie | 2003-2007 | 543 | 48.4% | 9.6% | 0.73 | 565 | 39.3% | 13.3% | 0.68 |
| Russian Federation, Saint Petersburg | 2003-2007 | 621 | 61.8% | 0.0% | 1.60 | 684 | 54.2% | 0% | 1.42 |
| Slovakia | 2003-2007 | 1,021 | 73.2% | 9.1% | 0.93 | 908 | 67% | 11.3% | 0.95 |
| Ukraine | 2003-2007 | 6,425 | 57.2% | 2.0% | 0.85 | 5,753 | 59% | 2% | 0.79 |
| **India** | India, Bangalore | 2005-2007 | 367 | 93.5% | 3.8% | -- | 216 | 90.7% | 7.4% | -- |
| India, Barshi, Paranda, and Bhum | 2003-2007 | 18 | 77.8% | -- | -- | 10 | 80.0% | -- | -- |
| India, Bhopal | 2004-2007 | 59 | 88.1% | 0.0% | -- | 55 | 76.4% | 0.0% | -- |
| India, Chennai | 2003-2007 | 344 | 67.7% | 2.0% | -- | 239 | 68.6% | 2.5% | -- |
| India, Dindigul, Ambilikkai | 2003-2007 | 77 | 67.5% | 7.8% | -- | 47 | 63.8% | 6.4% | -- |
| India, Karunagappally | 2003-2007 | 44 | 52.3% | 9.1% | -- | 25 | 52.0% | 20% | -- |
| India, Mizoram | 2003-2007 | 25 | 24.0% | 20.0% | -- | 13 | 38.5% | 0.0% | -- |
| India, Mumbai | 2003-2007 | 1,004 | 95.9% | 1.1% | -- | 605 | 95.5% | 1.7% | -- |
| India, New Delhi | 2003-2007 | 1,266 | 89.1% | 0.2% | -- | 691 | 86.1% | 0.1% | -- |
| India, Poona | 2003-2007 | 328 | 96.6% | 1.8% | -- | 213 | 96.7% | 1.4% | -- |
| India, Sikkim State | 2003-2007 | 26 | 19.2% | 3.8% | -- | 21 | 14.3% | 0.0% | -- |
| India, Trivandrum | 2005-2007 | 54 | 77.8% | 1.9% | -- | 38 | 68.4% | 5.3% | -- |
| **Latin America** | Argentina, Bahía Blanca | 2003-2007 | 39 | 71.8% | 28.2% | 0.77 | 53 | 67.9% | 28.3% | 0.79 |
| Argentina, Córdoba | 2004-2007 | 181 | 76.8% | 19.3% | 0.32 | 182 | 67.6% | 23.6% | 0.38 |
| Argentina, Mendoza | 2003-2007 | 203 | 72.4% | 22.2% | 0.67 | 189 | 66.1% | 25.4% | 0.53 |
| Argentina, Tierra del Fuego | 2003-2007 | 6 | 66.7% | 0.0% | 0.67 | 7 | 71.4% | 0% | 0.71 |
| Brazil, Fortaleza | 2003-2006 | 165 | 74.5% | 21.2% | 0.98 | 170 | 65.3% | 29.4% | 1.16 |
| Brazil, Goiânia | 2003-2007 | 247 | 85.4% | 10.5% | 0.53 | 172 | 82.6% | 11.6% | 0.70 |
| Brazil, São Paulo | 2003-2007 | 1,411 | 55.0% | 19.5% | 0.85 | 1,343 | 47.3% | 22.9% | 0.89 |
| Brazil, Cuiabá | 2003-2006 | 61 | 55.7% | 37.7% | 1.66 | 75 | 58.7% | 32% | 0.69 |
| Brazil, Aracaju | 2003-2005 | 42 | 59.5% | 33.3% | 0.76 | 38 | 57.9% | 39.5% | 0.87 |
| Brazil, Belo Horizonte | 2003-2007 | 174 | 75.3% | 24.1% | 0.77 | 173 | 67.6% | 30.1% | 0.70 |
| Chile, Valdivia | 2003-2007 | 37 | 48.6% | 13.5% | 0.54 | 33 | 45.5% | 18.2% | 0.49 |
| Chile, Bío Bío Province | 2003-2007 | 41 | 51.2% | 7.3% | 0.39 | 34 | 35.3% | 2.9% | 0.32 |
| Chile, Region of Antofagasta | 2003-2007 | 21 | 57.1% | 33.3% | 0.76 | 23 | 47.8% | 30.4% | 0.69 |
| Colombia, Cali | 2003-2007 | 254 | 86.2% | 2.4% | 0.70 | 240 | 78.3% | 6.7% | 0.76 |
| Colombia, Bucaramanga | 2003-2007 | 133 | 73.7% | 11.3% | 0.86 | 109 | 78.0% | 11% | 0.92 |
| Colombia, Manizales | 2003-2007 | 35 | 85.7% | 2.9% | 0.66 | 23 | 60.9% | 30.4% | 0.87 |
| Colombia, Pasto | 2003-2007 | 44 | 79.5% | 9.1% | 0.66 | 27 | 70.4% | 18.5% | 0.74 |
| Costa Rica | 2003-2007 | 359 | 69.6% | 13.1% | 0.82 | 260 | 67.7% | 13.1% | 0.75 |
| Cuba, Villa Clara | 2004-2007 | 106 | 65.1% | 8.5% | 0.95 | 83 | 55.4% | 13.3% | 0.94 |
| Ecuador, Quito | 2003-2007 | 141 | 89.4% | 3.5% | 0.63 | 142 | 88.0% | 5.6% | 0.54 |
| Ecuador, Cuenca | 2003-2007 | 35 | 82.9% | 2.9% | 0.74 | 28 | 57.1% | 3.6% | 0.86 |
| France, Martinique | 2003-2007 | 33 | 78.8% | -- | 0.73 | 27 | 77.8% | -- | 1.37 |
| Jamaica, Kingston and St Andrew | 2003-2007 | 16 | 68.8% | -- | -- | 28 | 85.7% | -- | -- |
| Uruguay | 2005-2007 | 346 | 69.7% | 16.2% | 0.67 | 276 | 61.6% | 21.0% | 0.53 |
| **Middle East and North Africa** | Algeria, Sétif | 2003-2007 | 66 | 89.4% | -- | -- | 49 | 93.9% | -- | -- |
| Bahrain: Bahraini | 2003-2007 | 37 | 83.8% | 5.4% | 0.68 | 19 | 57.9% | 10.5% | 0.74 |
| Cyprus | 2003-2007 | 117 | 77.8% | 14.5% | 0.57 | 102 | 65.7% | 20.6% | 0.59 |
| Egypt, Gharbiah | 2003-2007 | 371 | 67.1% | 24.8% | 0.64 | 275 | 66.2% | 26.2% | 0.63 |
| Iran (Islamic Republic of), Golestan Province | 2005-2007 | 153 | 51.6% | 5.9% | 0.20 | 101 | 40.6% | 9.9% | 0.15 |
| Israel | 2003-2007 | 1,144 | 88.6% | 4.6% | 0.73 | 932 | 83% | 8% | 0.75 |
| Kuwait | 2003-2007 | 132 | 84.8% | 2.3% | 0.65 | 62 | 87.1% | 0% | 0.50 |
| Libya, Benghazi | 2003-2005 | 87 | 60.9% | 18.4% | 0.69 | 50 | 52% | 12% | 0.64 |
| Qatar: Qatari | 2003-2007 | 15 | 46.7% | 20% | 0.93 | 17 | 82.4% | 5.9% | 0.59 |
| Saudi Arabia, Riyadh: Saudi | 2003-2007 | 230 | 87.8% | 0% | -- | 152 | 88.2% | 0% | -- |
| Tunisia, North | 2003-2005 | 184 | 95.1% | -- | -- | 134 | 88.8% | -- | -- |
| Turkey, Antalya | 2003-2007 | 220 | 86.8% | 0.9% | 0.78 | 162 | 85.8% | 2.5% | 0.98 |
| Turkey, Edirne | 2004-2007 | 56 | 67.9% | 14.3% | -- | 43 | 72.1% | 4.7% | -- |
| Turkey, Izmir | 2003-2007 | 552 | 78.8% | 6% | -- | 457 | 76.8% | 6.8% | -- |
| Turkey, Trabzon | 2005-2007 | 41 | 82.9% | 2.4% | -- | 49 | 81.6% | 2% | -- |
| **Northern Europe** | Denmark | 2003-2007 | 1,286 | 83.7% | 0.1% | 0.82 | 972 | 77.5% | 0.2% | 0.85 |
| Estonia | 2003-2007 | 227 | 87.7% | -- | 1.12 | 197 | 83.8% | -- | 1.25 |
| Finland | 2003-2007 | 962 | 84.5% | 2.0% | 0.85 | 872 | 76.6% | 2.4% | 0.83 |
| Iceland | 2003-2007 | 66 | 75.8% | 0.0% | 0.77 | 58 | 70.7% | 0.0% | 0.77 |
| Ireland | 2003-2007 | 902 | 72.7% | 1.9% | 0.78 | 662 | 63.4% | 2.6% | 0.75 |
| Latvia | 2004-2007 | 386 | 56% | 28.2% | 0.81 | 434 | 57.4% | 31.6% | 0.87 |
| Lithuania | 2003-2007 | 660 | 75.2% | 11.1% | 0.85 | 743 | 74.0% | 12.8% | 0.82 |
| Norway | 2003-2007 | 1,297 | 71.4% | 1.1% | 0.64 | 1,180 | 57.6% | 1.7% | 0.53 |
| Sweden | 2003-2007 | 2,866 | 91.5% | -- | 0.60 | 3,468 | 91.3% | -- | 0.37 |
| UK, England | 2003-2007 | 10,839 | 71.3% | 3.0% | 0.78 | 7,863 | 64.6% | 4.0% | 0.76 |
| UK, Northern Ireland | 2003-2007 | 357 | 61.6% | 0.6% | 0.73 | 256 | 57.8% | 0.4% | 0.64 |
| UK, Scotland | 2003-2007 | 1,091 | 68.1% | 0.6% | 0.92 | 781 | 63.3% | 0.5% | 0.91 |
| UK, Wales | 2003-2007 | 695 | 69.9% | 1.7% | 0.69 | 541 | 65.2% | 2.8% | 0.72 |
| **Southeast Asia** | Malaysia, Penang | 2004-2007 | 78 | 79.5% | -- | -- | 62 | 71.0% | -- | -- |
| Philippines, Manila | 2003-2007 | 299 | 61.2% | 17.4% | -- | 259 | 57.1% | 16.6% | -- |
| Philippines, Rizal | 2003-2007 | 335 | 68.4% | 18.5% | -- | 274 | 60.6% | 25.2% | -- |
| Thailand, Chiang Mai | 2003-2007 | 71 | 46.5% | 16.9% | 0.85 | 77 | 40.3% | 22.1% | 0.58 |
| Thailand, Khon Kaen | 2003-2007 | 61 | 49.2% | 14.8% | -- | 57 | 61.4% | 10.5% | -- |
| Thailand, Bangkok | 2003-2007 | 456 | 73.9% | 14.9% | 0.68 | 455 | 73.4% | 17.6% | 0.68 |
| Thailand, Songkhla | 2004-2007 | 72 | 43.1% | 15.3% | -- | 72 | 50.0% | 6.9% | -- |
| Thailand, Lampang | 2003-2007 | 46 | 54.3% | 26.1% | 1.46 | 43 | 46.5% | 16.3% | 1.28 |
| Thailand, Chonburi | 2003-2007 | 71 | 53.5% | 16.9% | 0.58 | 66 | 53.0% | 12.1% | 0.74 |
| **Southeast Africa** | Malawi, Blantyre | 2003-2007 | 4 | 50.0% | -- | -- | 3 | 0.0% | -- | -- |
| South Africa, PROMEC | 2003-2007 | 9 | 66.7% | -- | -- | 5 | 20.0% | -- | -- |
| Zimbabwe, Harare: African | 2003-2006 | 37 | 48.6% | 32.4% | -- | 38 | 55.3% | 28.9% | -- |
| Uganda, Kyadondo County | 2003-2007 | 37 | 27.0% | 2.7% | -- | 17 | 35.3% | 0.0% | -- |
| **Southern Europe** | Croatia | 2003-2007 | 1,399 | 55.5% | 5.2% | 0.72 | 1,341 | 51.8% | 5.3% | 0.71 |
| Italy, Biella | 2003-2007 | 50 | 44.0% | 0.0% | 0.72 | 47 | 38.3% | 0.0% | 0.72 |
| Italy, Brescia | 2003-2006 | 179 | 59.8% | 1.1% | 0.93 | 156 | 42.9% | 5.1% | 1.60 |
| Italy, Catania and Messina | 2003-2006 | 221 | 67.0% | 3.2% | 0.84 | 167 | 55.1% | 7.2% | 0.87 |
| Italy, Catanzaro | 2003-2007 | 64 | 65.6% | 3.1% | 0.86 | 44 | 72.7% | 2.3% | 0.80 |
| Italy, Como | 2003-2007 | 126 | 82.5% | 1.6% | 1.71 | 131 | 69.5% | 2.3% | 1.12 |
| Italy, Ferrara | 2003-2007 | 103 | 78.6% | 1.0% | 0.70 | 88 | 64.8% | 0.0% | 0.68 |
| Italy, Florence and Prato | 2003-2005 | 178 | 75.8% | 1.7% | 0.78 | 189 | 63.0% | 0.0% | 0.74 |
| Italy, Friuli−Venezia Giulia | 2003-2007 | 328 | 68.6% | 0.6% | 0.85 | 268 | 57.8% | 0.0% | 1.15 |
| Italy, Genoa | 2003-2006 | 195 | 53.3% | 1.0% | 0.73 | 151 | 37.1% | 4.0% | 0.72 |
| Italy, Latina | 2003-2007 | 134 | 69.4% | 2.2% | 1.15 | 89 | 62.9% | 2.2% | 0.93 |
| Italy, Lecco | 2003-2007 | 82 | 57.3% | 0.0% | 0.85 | 72 | 38.9% | 0.0% | 0.86 |
| Italy, Lombardy, South | 2003-2006 | 118 | 43.2% | 0.8% | 0.86 | 80 | 36.2% | 2.5% | 1.50 |
| Italy, Mantua | 2003-2005 | 64 | 57.8% | 3.1% | 0.58 | 53 | 47.2% | 0.0% | 0.70 |
| Italy, Milan | 2003-2006 | 261 | 68.2% | 1.9% | 0.61 | 204 | 56.9% | 2.9% | 0.65 |
| Italy, Modena | 2003-2007 | 160 | 57.5% | 0.0% | 0.71 | 128 | 50.8% | 1.6% | 0.80 |
| Italy, Naples | 2003-2007 | 106 | 64.2% | 2.8% | 0.84 | 103 | 63.1% | 5.8% | 0.82 |
| Italy, Nuoro | 2003-2007 | 48 | 75% | 2.1% | 1.00 | 44 | 47.7% | 4.5% | 1.18 |
| Italy, Palermo | 2003-2007 | 207 | 45.4% | 2.9% | 0.63 | 160 | 39.4% | 6.2% | 0.58 |
| Italy, Parma | 2003-2007 | 116 | 64.7% | 0.0% | 0.58 | 122 | 48.4% | 0.8% | 0.60 |
| Italy, Ragusa | 2003-2007 | 87 | 64.4% | 1.1% | 0.49 | 56 | 57.1% | 0.0% | 0.49 |
| Italy, Reggio Emilia | 2003-2007 | 130 | 43.1% | 0.8% | 0.75 | 115 | 52.2% | 0.9% | 0.73 |
| Italy, Romagna | 2003-2007 | 338 | 50.3% | 0.3% | 0.67 | 320 | 45.3% | 0.9% | 0.65 |
| Italy, Salerno | 2003-2007 | 268 | 68.3% | 4.1% | 0.94 | 237 | 54.0% | 6.8% | 0.85 |
| Italy, Sassari | 2003-2007 | 113 | 36.3% | 7.1% | 0.70 | 104 | 36.5% | 8.7% | 0.51 |
| Italy, Sondrio | 2003-2007 | 41 | 65.9% | 0.0% | 0.85 | 37 | 67.6% | 0.0% | 0.73 |
| Italy, South Tyrol | 2003-2007 | 78 | 89.7% | 0.0% | 0.76 | 62 | 77.4% | 1.6% | 0.77 |
| Italy, Syracuse | 2003-2007 | 83 | 57.8% | 4.8% | 1.12 | 68 | 35.3% | 10.3% | 1.88 |
| Italy, Trapani | 2003-2006 | 87 | 56.3% | 0.0% | 0.71 | 53 | 39.6% | 0.0% | 0.76 |
| Italy, Trento | 2003-2006 | 78 | 70.5% | 0.0% | 0.94 | 72 | 72.2% | 1.4% | 1.28 |
| Italy, Turin | 2003-2007 | 220 | 64.5% | 1.8% | 0.64 | 223 | 55.2% | 1.3% | 0.68 |
| Italy, Umbria | 2003-2007 | 282 | 67.7% | 0.4% | 0.83 | 207 | 60.9% | 0.5% | 0.92 |
| Italy, Varese | 2003-2007 | 219 | 58.4% | 0.9% | 0.70 | 174 | 52.9% | 2.9% | 0.76 |
| Italy, Veneto | 2003-2006 | 508 | 70.1% | 1.2% | 0.64 | 421 | 59.1% | 0.7% | 0.68 |
| Malta | 2003-2007 | 64 | 92.2% | 6.2% | 0.73 | 58 | 79.3% | 8.6% | 0.69 |
| Portugal, Azores | 2003-2007 | 38 | 73.7% | 10.5% | 0.57 | 40 | 62.5% | 5.0% | 0.67 |
| Serbia, Central | 2003-2007 | 1,927 | 75.7% | 7.9% | 0.75 | 1,544 | 76.8% | 7.4% | 0.73 |
| Slovenia | 2003-2007 | 377 | 88.6% | 1.3% | 0.88 | 318 | 77.0% | 2.8% | 1.44 |
| Spain, Albacete | 2003-2007 | 89 | 51.7% | 2.2% | 0.75 | 64 | 51.6% | 7.8% | 0.88 |
| Spain, Asturias | 2003-2007 | 246 | 74.8% | 6.5% | 0.85 | 203 | 71.9% | 7.4% | 0.92 |
| Spain, Basque Country | 2003-2007 | 566 | 71% | 2.8% | 0.75 | 451 | 63.2% | 4.0% | 0.75 |
| Spain, Canary Islands | 2003-2006 | 245 | 73.9% | 3.3% | 0.80 | 180 | 71.7% | 2.8% | 0.83 |
| Spain, Ciudad Real | 2004-2007 | 90 | 50% | 5.6% | 0.74 | 77 | 59.7% | 3.9% | 0.79 |
| Spain, Cuenca | 2003-2007 | 42 | 42.9% | 7.1% | 0.81 | 37 | 43.2% | 2.7% | 0.68 |
| Spain, Girona | 2003-2007 | 149 | 57.7% | 6.7% | 0.64 | 129 | 61.2% | 4.7% | 0.71 |
| Spain, Granada | 2003-2007 | 170 | 80.0% | -- | 0.67 | 141 | 75.9% | -- | 0.73 |
| Spain, La Rioja | 2003-2007 | 68 | 57.4% | 5.9% | 0.85 | 45 | 55.6% | 2.2% | 1.11 |
| Spain, Mallorca | 2003-2007 | 144 | 64.6% | 9.0% | 0.80 | 105 | 67.6% | 6.7% | 0.76 |
| Spain, Murcia | 2003-2007 | 233 | 79.4% | 4.3% | 0.73 | 237 | 68.8% | 3.8% | 0.62 |
| Spain, Navarra | 2003-2007 | 169 | 56.2% | 0.6% | 0.86 | 148 | 43.2% | 3.4% | 0.81 |
| Spain, Tarragona | 2003-2007 | 151 | 76.2% | 3.3% | 0.69 | 111 | 64.0% | 3.6% | 0.69 |
| **Western Europe** | Austria | 2003-2007 | 1,783 | 86.7% | 8.5% | 0.73 | 1,570 | 81.7% | 12.2% | 0.79 |
| Belgium | 2004-2007 | 1,799 | 95.2% | -- | 0.70 | 1,329 | 93.4% | -- | 0.84 |
| France, Haut−Rhin | 2003-2007 | 102 | 94.1% | -- | 0.81 | 85 | 94.1% | -- | 0.75 |
| France, Bas−Rhin | 2003-2007 | 209 | 83.3% | -- | 0.58 | 176 | 70.5% | -- | 0.64 |
| France, Calvados | 2003-2007 | 122 | 86.9% | -- | 0.75 | 104 | 78.8% | -- | 0.64 |
| France, Doubs | 2003-2007 | 93 | 92.5% | -- | 0.70 | 66 | 63.6% | -- | 0.77 |
| France, Hérault | 2003-2007 | 192 | 80.7% | -- | 0.66 | 176 | 79.0% | -- | 0.53 |
| France, Isère | 2003-2007 | 248 | 85.5% | -- | 0.60 | 176 | 78.4% | -- | 0.62 |
| France, Loire−Atlantique | 2003-2007 | 261 | 87.0% | -- | 0.66 | 185 | 81.6% | -- | 0.70 |
| France, Manche | 2003-2007 | 107 | 79.4% | -- | 0.69 | 77 | 84.4% | -- | 0.60 |
| France, Somme | 2003-2007 | 86 | 74.4% | -- | 0.65 | 80 | 55.0% | -- | 0.76 |
| France, Tarn | 2003-2007 | 95 | 83.2% | -- | 0.68 | 76 | 75.0% | -- | 0.63 |
| France, Vendée | 2003-2007 | 122 | 90.2% | -- | 0.97 | 94 | 89.4% | -- | 0.80 |
| Germany, Brandenburg | 2003-2007 | 613 | 78.3% | 18.1% | 0.78 | 520 | 74.2% | 21.3% | 0.77 |
| Germany, Bremen | 2003-2007 | 129 | 75.2% | 15.5% | 1.24 | 141 | 78.0% | 12.1% | 1.16 |
| Germany, Free State of Saxony | 2003-2007 | 1,029 | 83.3% | 12.1% | 0.88 | 977 | 77.3% | 17.9% | 0.79 |
| Germany, Hamburg | 2003-2007 | 374 | 85.3% | 8.6% | 0.89 | 291 | 80.8% | 12.0% | 0.96 |
| Germany, Mecklenburg−Western Pomerania | 2003-2007 | 369 | 83.2% | 13.8% | 0.86 | 285 | 74.4% | 19.6% | 0.78 |
| Germany, Munich | 2003-2007 | 889 | 83.1% | 13.2% | 0.88 | 810 | 73.5% | 20.0% | 0.89 |
| Germany, North Rhine−Westphalia | 2003-2007 | 546 | 85.5% | 5.7% | 0.94 | 394 | 79.4% | 9.4% | 1.18 |
| Germany, Saarland | 2003-2007 | 273 | 87.5% | 8.1% | 0.80 | 243 | 77.4% | 14.8% | 0.74 |
| Germany, Schleswig−Holstein | 2003-2007 | 628 | 77.1% | 13.9% | 0.79 | 539 | 70.7% | 19.3% | 0.90 |
| Switzerland, Neuchâtel | 2003-2007 | 35 | 88.6% | 2.9% | 0.80 | 30 | 66.7% | 0.0% | 0.90 |
| Switzerland, Basel | 2003-2007 | 88 | 94.3% | 5.7% | 0.76 | 67 | 98.5% | 1.5% | 0.84 |
| Switzerland, Geneva | 2003-2007 | 71 | 90.1% | 0.0% | 0.87 | 82 | 79.3% | 0.0% | 0.68 |
| Switzerland, Graubünden and Glarus | 2003-2007 | 54 | 81.5% | 0.0% | 0.78 | 34 | 79.4% | 0.0% | 0.65 |
| Switzerland, St Gall−Appenzell | 2003-2007 | 115 | 93.9% | 0.0% | 0.82 | 91 | 86.8% | 1.1% | 0.73 |
| Switzerland, Ticino | 2003-2007 | 65 | 89.2% | 1.5% | 0.62 | 70 | 78.6% | 7.1% | 0.79 |
| Switzerland, Valais | 2003-2007 | 52 | 80.8% | 0.0% | 0.83 | 43 | 76.7% | 0.0% | 0.74 |
| Switzerland, Vaud | 2003-2007 | 127 | 88.2% | 2.4% | 0.73 | 94 | 79.8% | 1.1% | 0.83 |
| Switzerland, Zurich | 2003-2007 | 271 | 86.7% | 1.5% | 0.77 | 193 | 77.2% | 2.1% | 0.78 |
| The Netherlands | 2003-2007 | 3,141 | 85.9% | -- | 0.76 | 2,266 | 81.2% | -- | 0.79 |

-- Measure not available

Abbreviations: DCO: Death certificate only; MIR: Mortality-to-incidence ratio; MV: Microscopically verified
